# Supplementary material for: Insight into the effects of graphene oxide sheets on the conformation and activity of glucose oxidase: towards developing a nanomaterial-based protein conformation assay
Source: Royal Society of Chemistry journal article supplement (doi:10.1039/c2cp40654c), 2012-01-01
Supplement: c2cp40654c.pdf [file c2cp40654c.pdf]

## Electronic Supplementary Information:

Insights into the effects of graphene oxide sheet on the conformation  
and activity of glucose oxidase: towards developing a nanomaterial–  
based protein conformation assay

Qian Shao, Ping Wu, Xiaoqing Xu, Hui Zhang and Chenxin Cai\*

*Jiangsu Key Laboratory of New Power Batteries, College of Chemistry and Materials Science, Nanjing  
Normal University, Nanjing 210097, China.*

\* Corresponding author, E-mail: [cxcai@njnu.edu.cn](mailto:cxcai@njnu.edu.cn) (C. Cai); Tel: 86-25-85891780; Fax: 86-25-85891767.

## 1. XPS spectrum of GO

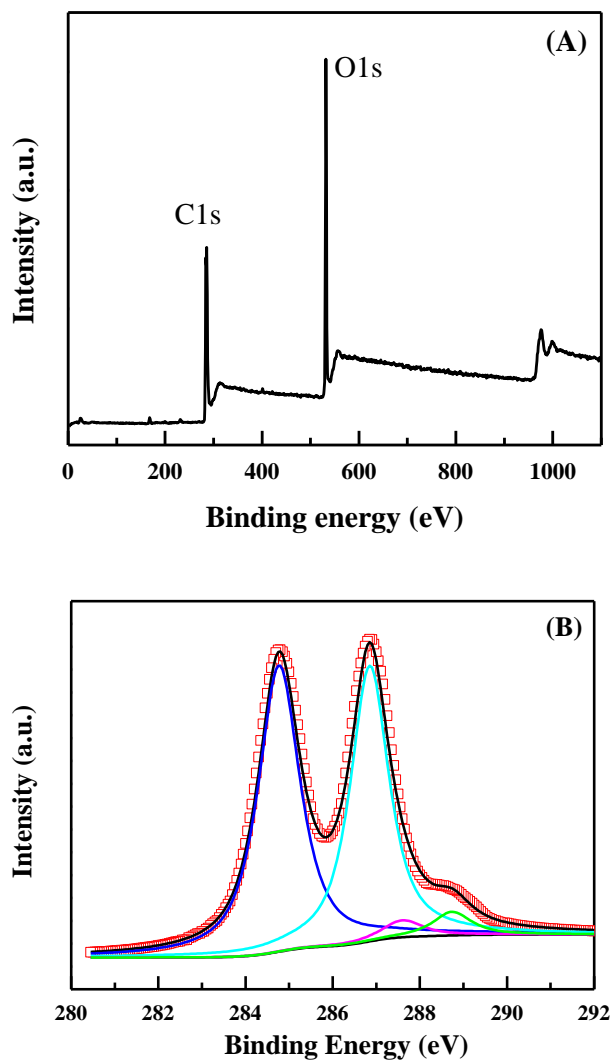

**Fig. S1** (A) XPS spectrum of the prepared GO sheets; (B) is XPS spectra of C1s in GO and their related curve-fitted components.

## 2. FAD fluorescence emission spectra

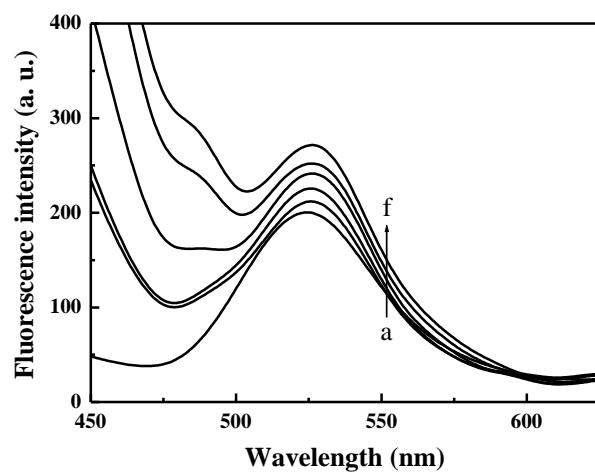

**Fig. S2** The FAD fluorescence emission spectra of native GOx ( $150 \mu\text{g mL}^{-1}$ , a) and the GOx-GO bioconjugate system with GOx concentration fixed at  $150 \mu\text{g mL}^{-1}$  and GO concentration of 2.5 (b), 5 (c), 10 (d), 20 (e), and  $25 \mu\text{g mL}^{-1}$  (f) in 0.1 M PBS (pH 7.0). The excitation wavelength is 373 nm.

### 3. Fluorescence emission spectra of GO

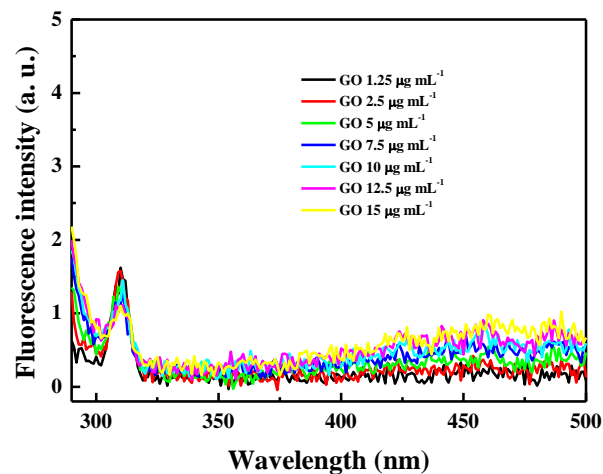

**Fig. S3** The fluorescence emission spectra of GO in PBS at a concentration of 1.25, 2.5, 5, 7.5, 10, 12.5, and 15  $\mu\text{g mL}^{-1}$ , respectively. The excitation wavelength is 279 nm.

#### 4. CD spectra of the GO<sub>x</sub>–GO bioconjugate system at different interaction time

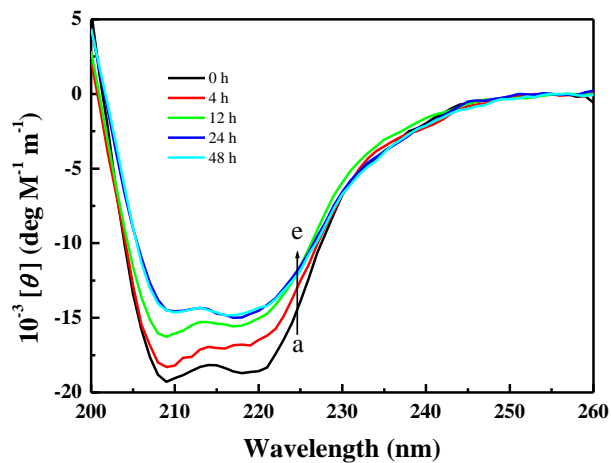

**Fig. S4** Far-UV CD spectra of native GO<sub>x</sub> ( $300 \mu\text{g mL}^{-1}$ , a) and GO<sub>x</sub>–GO bioconjugate system with GO<sub>x</sub> concentration at  $300 \mu\text{g mL}^{-1}$  and GO concentration at  $25 \mu\text{g mL}^{-1}$  in PBS (0.1 M, pH 7.0) for the interaction time of 4 (b), 12 (c), 24 (d), and 48 h (e), respectively.

## 5. CD spectra of native GOx and GOx–GO bioconjugate system at different solution pH

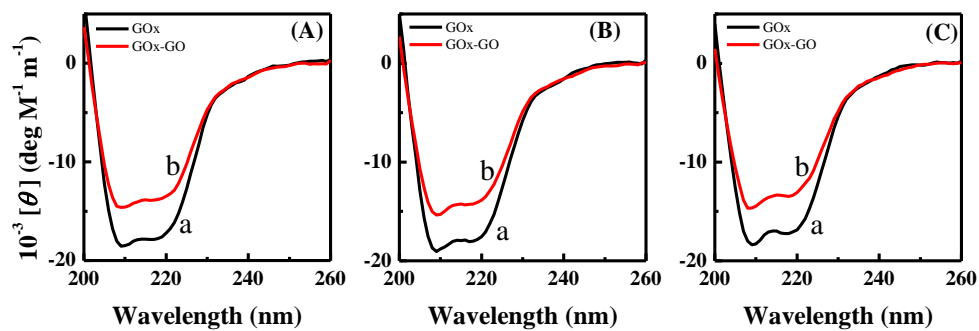

**Fig. S5** Far-UV CD spectra of native GOx ( $300 \mu\text{g mL}^{-1}$ , a) and GOx–GO bioconjugate system with the GOx concentration at  $300 \mu\text{g mL}^{-1}$  and GO concentration at  $25 \mu\text{g mL}^{-1}$  in PBS (0.1 M) at pH of 6.0 (A), 7.0 (B), and 8.0 (C), respectively.

## 6. CD spectra of native GOx at different ionic strength

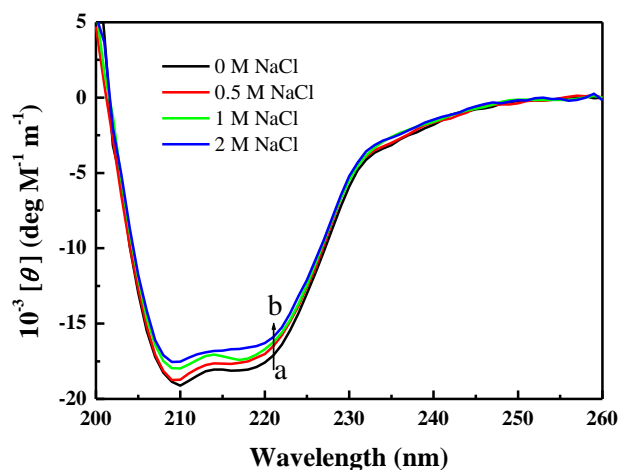

**Fig. S6** Far-UV CD spectra of native GOx (300  $\mu\text{g mL}^{-1}$ ) in PBS (0.1 M, pH 7.0) under the presence of 0 (a), 0.5 (b), 1.0 (c), and 2.0 M NaCl (d), respectively.

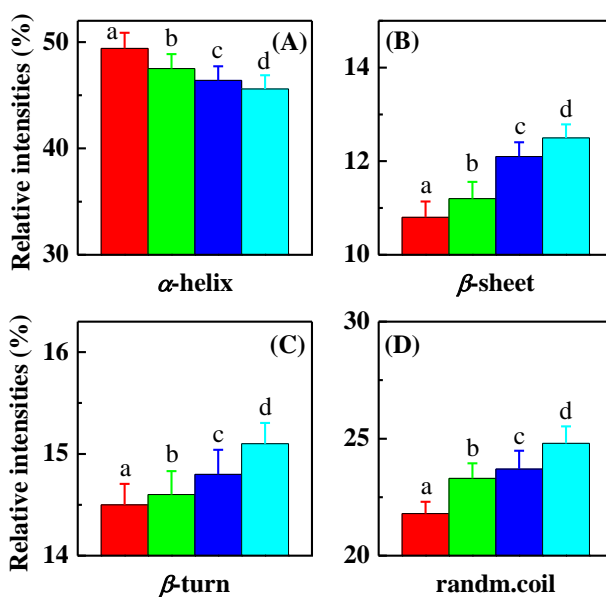

**Fig. S7** Relative amount of  $\alpha$ -helix (A),  $\beta$ -sheet (B),  $\beta$ -turn (C), and random coil (D) of native GOx in PBS (0.1 M, pH 7.0) under the presence of 0 (a), 0.5 (b), 1.0 (c), and 2.0 M NaCl (d), respectively. The data were obtained from CD spectra presented in Fig. S6 using a CDNN program. The data represented here are obtained by averaging the five independent measurements ( $n = 5$ ). The error bar represents the standard deviation.

## 7. Effects of ionic strength on the disperse ability of GO and the GO<sub>x</sub>–GO bioconjugates

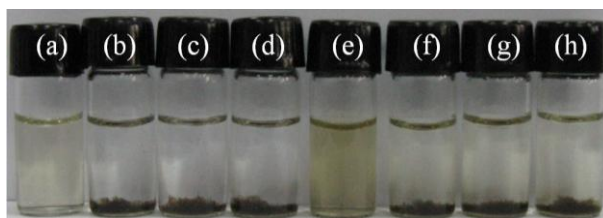

**Fig. S8** Pictures of GO (a–d) and GO<sub>x</sub>–GO bioconjugates (e–h) in PBS (0.1 M, pH 7.0) containing different concentration of NaCl. The concentration of NaCl is 0 (a, e), 0.5 (b, f), 1.0 (c, g), and 2.0 M (d, h). The concentration of GO in PBS is 25  $\mu\text{g mL}^{-1}$ . The GO<sub>x</sub>–GO bioconjugates were prepared with GO<sub>x</sub> at 300  $\mu\text{g mL}^{-1}$  and GO at 25  $\mu\text{g mL}^{-1}$ .



## 8. Dependent of absorbance of the enzymatic system on reaction time

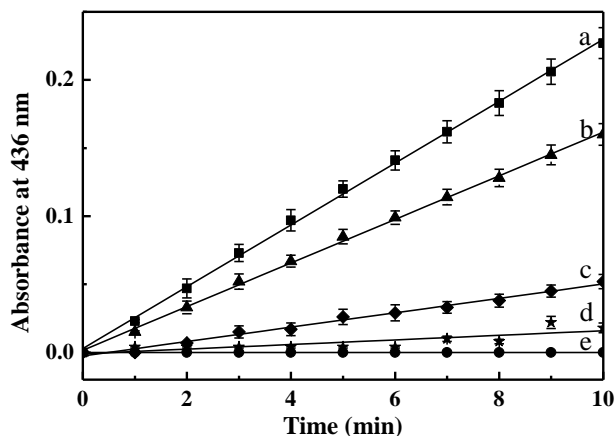

**Fig. S9** Dependent of absorbance of oxidized form of *o*-dianisidine generating in the catalytic system at 436 nm on reaction time for native GOx ( $0.6 \mu\text{g mL}^{-1}$ , a) and GOx-GO bioconjugate system with the concentrations of GO of 2.5 (b), 5 (c), and  $25 \mu\text{g mL}^{-1}$  (d) in PBS (0.1 M, pH 7.0). The catalytic system contains  $16.7 \text{ mg mL}^{-1}$   $\beta$ -D-glucose,  $8 \mu\text{g mL}^{-1}$  HRP, and  $53 \mu\text{g mL}^{-1}$  *o*-dianisidine. The volume of the system is 3.1 mL. Curve (e) displays the absorbance of the system with native GOx being replaced by GO ( $25 \mu\text{g mL}^{-1}$ ). The data represented here are obtained by averaging the five independent measurements ( $n = 5$ ). The error bar represents the standard deviation.
